# Supplementary material for: Sensory Processing Issues and Their Association with Social Difficulties in Children with Autism Spectrum Disorders
Source: MDPI journal article supplement (doi:10.3390/jcm8101508), 2019-09-20
Supplement: s1 [file s1]

**Table S2.** Correlations between VABS-II domains and sections of the SSP in children with ASD (n = 64)

| Measures                 |                              | VABS-II Domains (SStd) |               |                     |                |              |
|--------------------------|------------------------------|------------------------|---------------|---------------------|----------------|--------------|
|                          |                              | Total                  | Communication | Daily-Living skills | Socialization  | Motor skills |
| SSP Sections (Raw score) | Total                        | -.283*                 | -.133         | -.513**             | -.385**        | -.220        |
|                          | Tactile <sup>1</sup>         | -.237                  | -.097         | -.423**             | -.313*         | -.210        |
|                          | Smell/Taste <sup>1</sup>     | -.083                  | -.006         | -.0246              | 0,209          | -.019        |
|                          | Movement <sup>1</sup>        | -.030                  | -.172         | -.0236              | 0,074          | -.016        |
|                          | Unresponsiveness/Seeking1    | -.223                  | -.150         | -.513**             | -.276*         | -.159        |
|                          | Auditory Filter <sup>1</sup> | -.364**                | -.241         | <b>-.582**</b>      | <b>-.456**</b> | -.263*       |
|                          | Low/Weak <sup>1</sup>        | -.0197                 | -.102         | -.0193              | -.229          | -.229        |
|                          | Visual/Auditory1             | -.201                  | -.092         | -.352**             | -.214          | -.166        |

Note. *Pearson*<sup>1</sup> correlations were conducted depending of measures distribution, following D'agostino & Pearson test. Significant results after Bonferroni correction are shown in bold (p < 0.0018).

\*\* Correlation is significant at the 0.01 level (2-tailed).

\* Correlation is significant at the 0.05 level (2-tailed)
