# Supplementary material for: Sensory Processing Issues and Their Association with Social Difficulties in Children with Autism Spectrum Disorders
Source: MDPI journal article supplement (doi:10.3390/jcm8101508), 2019-09-20
Supplement: s1 [file s1]

**Table S1.** Correlations between SRS-2 domains and sections of the SSP in children with ASD (n = 64)

| Measures                 |                                       | SRS-2 Domains (T-score) |                |                |                |                |                |                |                |
|--------------------------|---------------------------------------|-------------------------|----------------|----------------|----------------|----------------|----------------|----------------|----------------|
|                          |                                       | Total                   | Communication  | Cognition      | Awareness      | Motivation     | RRB            | SCI            | RRBI           |
| SSP Sections (Raw score) | Total                                 | <b>-.578**</b>          | <b>-.518**</b> | <b>-.513**</b> | -.282*         | <b>-.542**</b> | <b>-.566**</b> | <b>-.529**</b> | <b>-.620**</b> |
|                          | Tactile <sup>1</sup>                  | <b>-.465**</b>          | <b>-.429**</b> | <b>-.423**</b> | -.264*         | <b>-.484**</b> | -.373**        | <b>-.440**</b> | <b>-.455**</b> |
|                          | Smell/Taste <sup>1</sup>              | -.290*                  | -.272*         | -.246          | .007           | -.287*         | -.353**        | -.264*         | -.367**        |
|                          | Movement <sup>1</sup>                 | -.0249                  | -.211          | -.236          | .004           | -.318*         | -.279*         | .096           | -.319*         |
|                          | Unresponsiveness/Seeking <sup>2</sup> | <b>-.600**</b>          | <b>-.492**</b> | <b>-.513**</b> | <b>-.431**</b> | <b>-.548**</b> | <b>-.500**</b> | <b>-.547**</b> | <b>-.691**</b> |
|                          | Auditory Filter <sup>1</sup>          | <b>-.649**</b>          | <b>-.601**</b> | <b>-.582**</b> | <b>-.439**</b> | <b>-.585**</b> | <b>-.472**</b> | <b>-.638**</b> | <b>-.525**</b> |
|                          | Low/Weak <sup>1</sup>                 | -.0192                  | -.207          | -.193          | -.087          | -.146          | -.264*         | -.162          | -.204          |
|                          | Visual/Auditory <sup>2</sup>          | -.299*                  | -.247          | -.352**        | -.068          | -.256          | -.308*         | -.301*         | -.265*         |

Note. *Spearman*<sup>1</sup> et *Pearson*<sup>2</sup> correlations were conducted depending of measures distribution, following D'agostino & Pearson test. Significant results after Bonferroni correction are shown in bold (p < 0.0010).

\*\* Correlation is significant at the 0.01 level (2-tailed).

\* Correlation is significant at the 0.05 level (2-tailed).
