# Supplementary figures and images for: Sensory Processing Issues and Their Association with Social Difficulties in Children with Autism Spectrum Disorders
Source: MDPI journal article supplement (doi:10.3390/jcm8101508), 2019-09-20

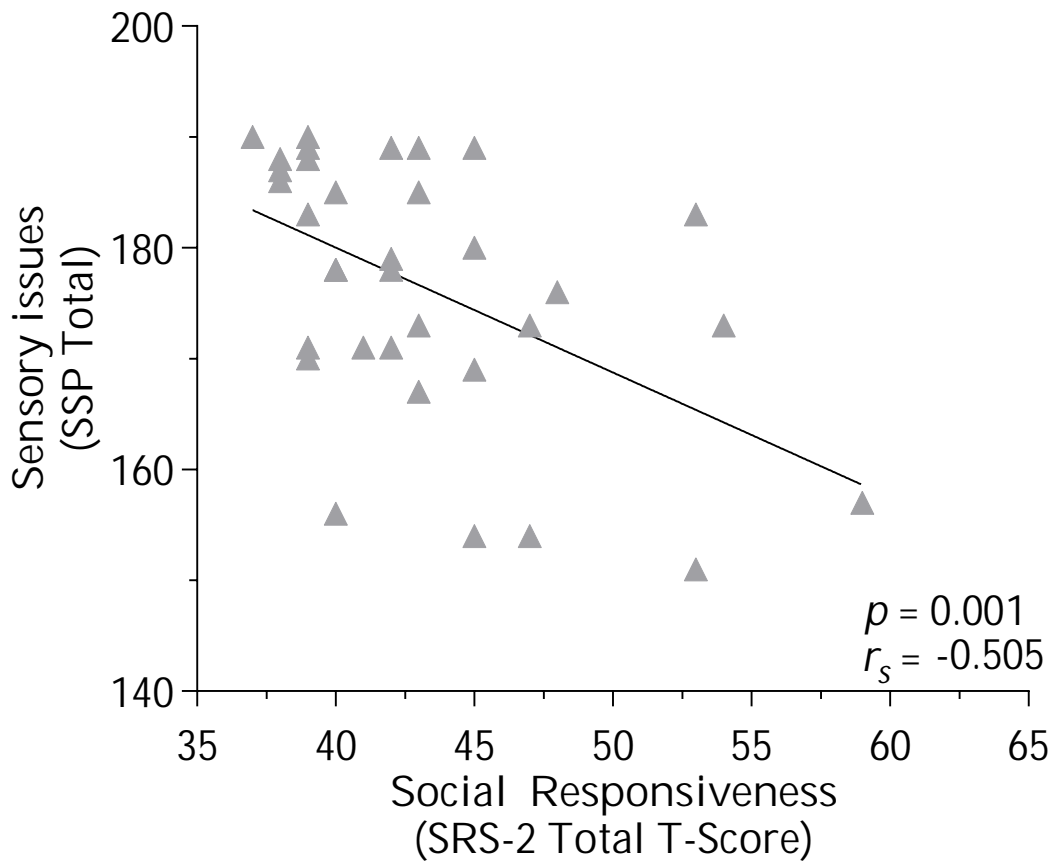

Supplement: s1 [file s1]
